# Supplementary material for: Differential diagnosis and prognosis of small renal masses: association with collateral vessels detected using contrast-enhanced computed tomography
Source: PubMed Central journal article supplement (PMC9354334; doi:10.1186/s12885-022-09971-w), 2022-08-05
Supplement: 12885_2022_9971_MOESM1_ESM.pdf [file 12885_2022_9971_MOESM1_ESM.pdf]

**Supplementary Fig. 1** Representative images of AML showing the absence of CV on CECT

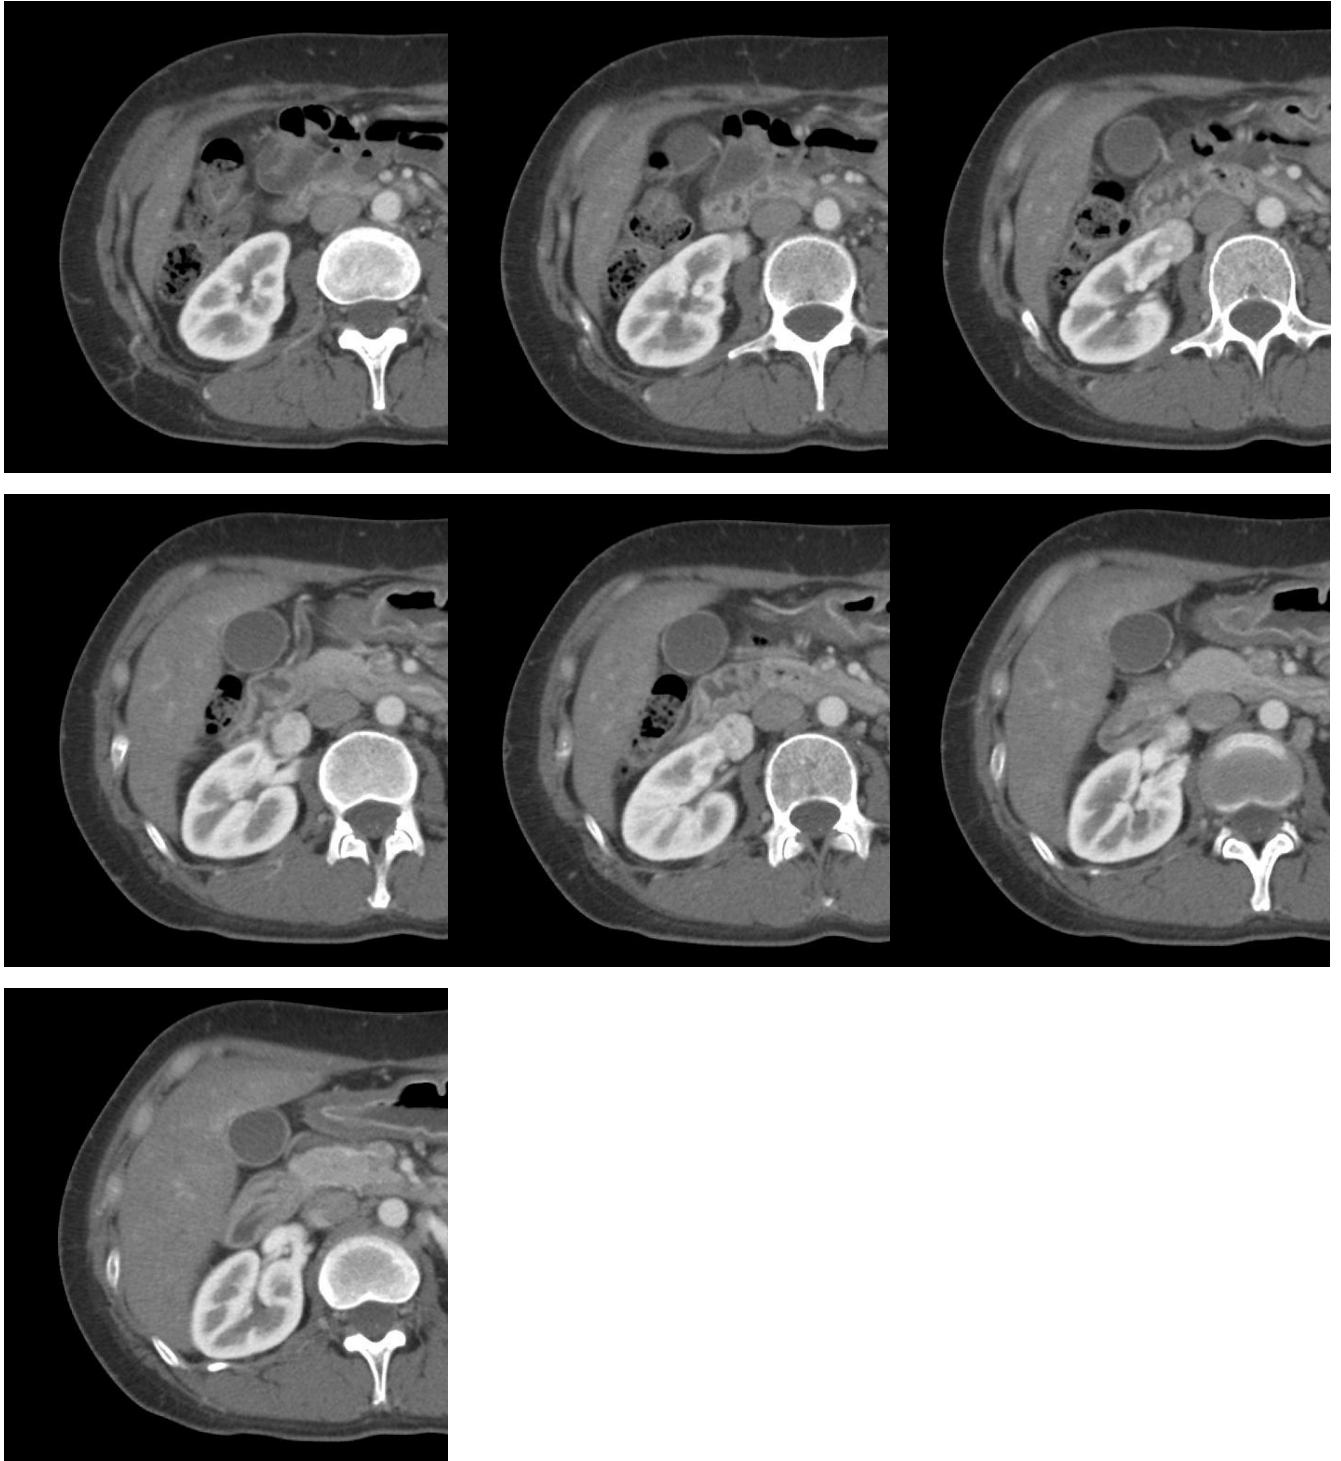

CVs could not be detected in AML.

AML, angiomyolipoma; CV, collateral vessel; CECT, contrast-enhanced computed tomography
